# Supplementary material for: Genetic predisposition to neural crest-derived tumors: revisiting the role of KIF1B
Source: PubMed Central journal article supplement (PMC7707833; doi:10.1530/ec-20-0460), 2020-10-08
Supplement: supplementary_figure_1.pdf [file supplementary_figure_1.pdf]

**68257 detected variants from proband WES data**

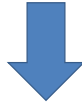

Not present in Father

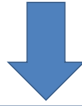

DP  $\geq$  20 & QUAL  $\geq$  100 \*

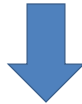

Zygoty : Heterozygous

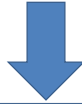

Pathogenicity in any :  
PolyPhen2 prediction, HumDiv, HumVar : probably damaging, possibly damaging,  
MutationTaster prediction : disease causing automatic, disease causing,  
MutationAssessor prediction : High, Medium,  
PROVEAN prediction : damaging

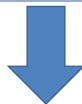

Coding effect : all except synonymous

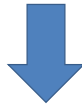

Population Frequency as rare :  
ESP6500 < 1%  
ExAC < 1%  
1000G Phase 1 < 1%  
1000G Phase 3 < 1%

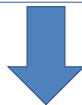

**125 selected variants for manual curation**
