# Supplementary material for: Genetic predisposition to neural crest-derived tumors: revisiting the role of KIF1B
Source: PubMed Central journal article supplement (PMC7707833; doi:10.1530/ec-20-0460), 2020-10-08
Supplement: supplementary_figure_2.pdf [file supplementary_figure_2.pdf]

| Sequence                                                                          | Max genotype | Individual ID               | DNA source |
|-----------------------------------------------------------------------------------|--------------|-----------------------------|------------|
| 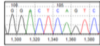 | S49S (WT)    | Proband's mother            | germline   |
|  | S49P         | Proband's father (II-4)     | germline   |
|  | S49P         | Proband's brother (III-2)   | germline   |
|  | S49P         | Proband (III-1)             | germline   |
|  | S49P         | Proband's left phéo (III-1) | tumor      |
